# Supplementary material for: Beneficial islet inflammation in health depends on pericytic TLR/MyD88 signaling
Source: JCI journal article supplement (doi:10.1172/jci179335), 2024-06-17
Supplement: sd1 [file 1]

## **Supplemental Data**

### **Beneficial islet inflammation in health depends on pericytic TLR/MyD88 signaling**

Anat Schonblum, Dunia Ali Naser, Shai Ovadia, Mohammed Egbaria, Shani Puyesky, Alona Epshtein,  
Tomer Wald, Sophia Mercado-Medrez, Ruth Ashery-Padan and Limor Landsman

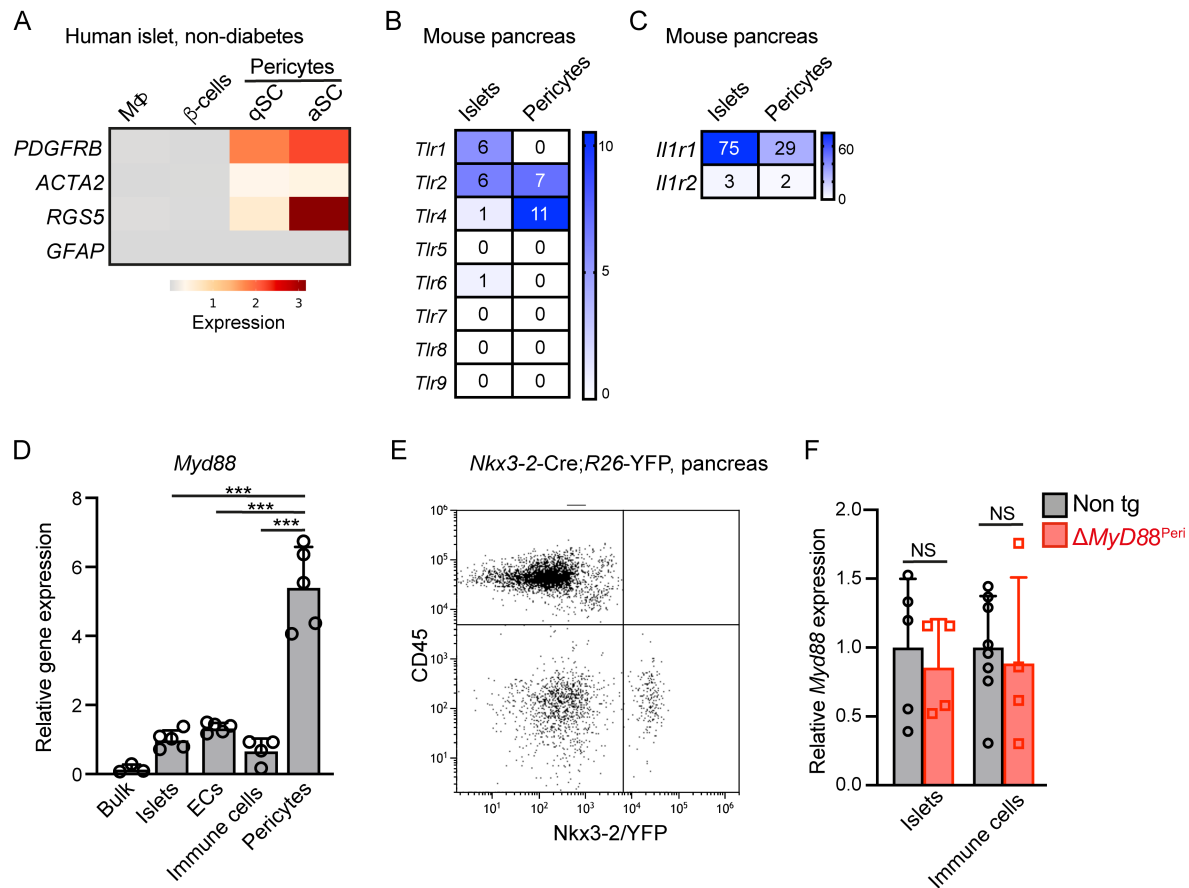

### Supplemental Figure 1: Expression of the TLR/IL1R pathway components in the pancreas

**A)** Heatmap showing relative expression of pericytes and stellate cell markers in macrophages (cluster 10), beta-cells (cluster 3), and pericytes [clusters 5 and 9, originally annotated as 'quiescent stellate (qSC)' and 'activated stellate (aSC)'], employing published scRNA-Seq analysis of islets from healthy human donors (1).

**B, C)** Heatmap showing relative expression of TLR/IL1R pathway receptors in isolated pericytes and islets, employing a previously published RNAseq analysis of mouse pancreata (2).

**D)** Bar diagram (mean  $\pm$  SD) shows qPCR analysis of *Myd88* (E) transcripts in bulk pancreatic tissues, isolated islets (average set to '1'), pancreatic endothelial cells (ECs), pancreatic immune cells and pancreatic pericytes of adult mice. N = 3-5. \*\*\*p < 0.005 (Student's t test). Each dot represents a single sample.

**E)** Representative dot plot showing immune cells (CD45<sup>+</sup> cells) in pancreata of YFP<sup>Peri</sup> (*Nkx3.2-Cre;R26-YFP*) mice.

**F)** Bar diagram (mean  $\pm$  SD) showing the results of qPCR analysis of *Myd88* transcripts in pancreatic cells. Islets and immune cells (CD45<sup>+</sup> cells) were isolated from *Nkx3.2-Cre;Myd88<sup>fllox/fllox</sup>* ( $\Delta MyD88^{Peri}$ ; red) and non-transgenic ("non tg"; gray; the average was set to '1') mice. N = 4-8. Each dot represents a single sample.

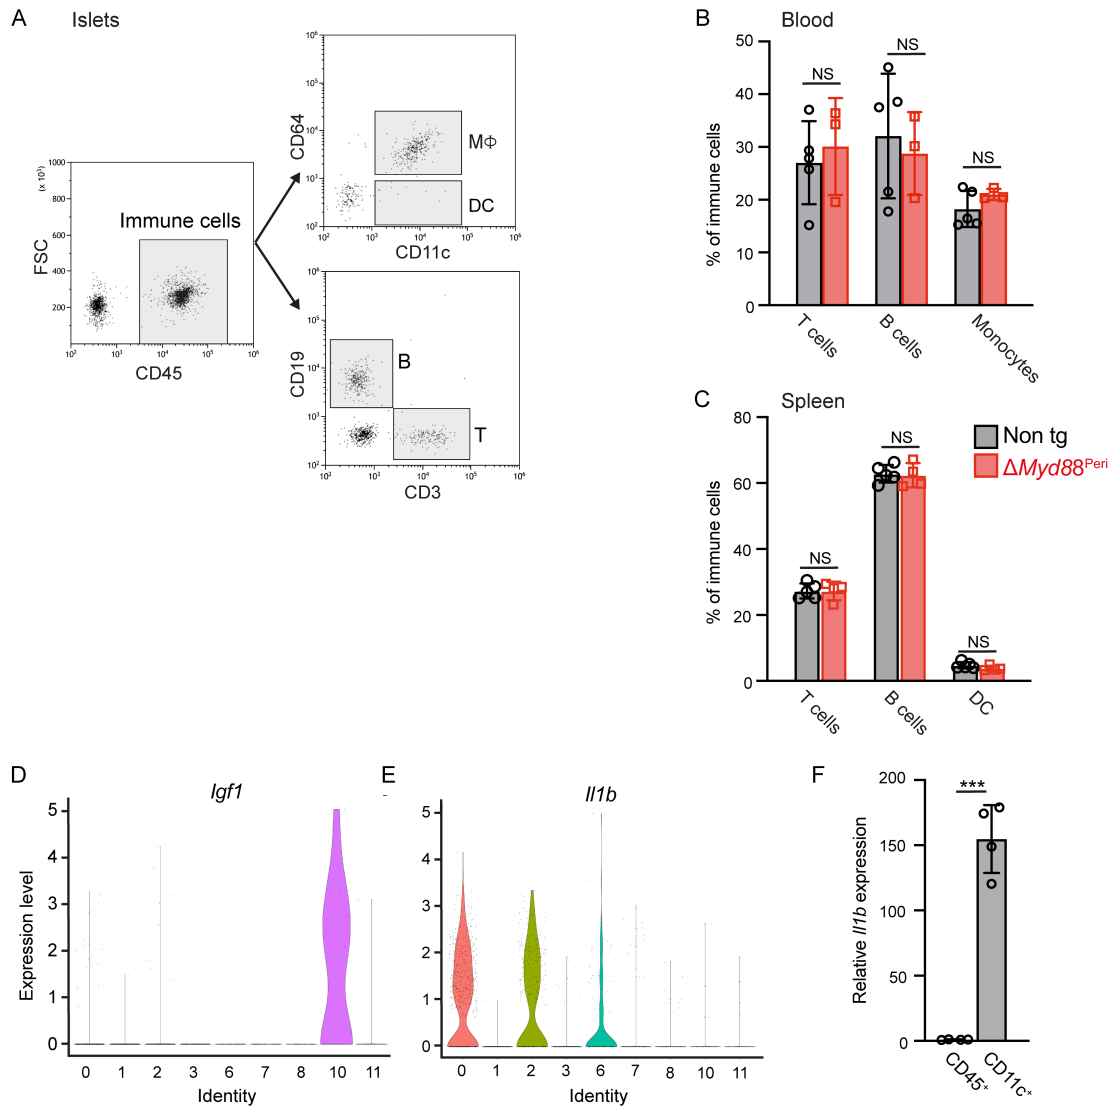

**Supplemental Figure 2: Analysis of immune cells in the islet, spleen, and blood of MyD88-deficient mice**

15-week-old  $\Delta MyD88^{Peri}$  (red) and non-transgenic (gray) mice were analyzed.

**A)** Representative dot plots indicating gate used to identify islet cells: Immune cells (Left panel, CD45<sup>+</sup> cells), macrophages (MΦ; Top right panel, CD45<sup>+</sup>CD11c<sup>+</sup>CD64<sup>+</sup> cells), DCs (Top right panel, CD45<sup>+</sup>CD11c<sup>+</sup>CD64<sup>-</sup> cells), T cells (Bottom right panel, CD45<sup>+</sup>CD3<sup>+</sup> cells) and B cells (Bottom right panel, CD45<sup>+</sup>CD19<sup>+</sup> cells).

**B)** Bar diagrams (mean  $\pm$  SD) showing the portion of T cells (CD3<sup>+</sup>), B cells (CD19<sup>+</sup>), and monocytes (CD115<sup>+</sup>) out of total blood immune (CD45<sup>+</sup>) cells. N = 3-4.

**C)** Bar diagrams (mean  $\pm$  SD) showing the portion of T cells (CD3<sup>+</sup>), B cells (CD19<sup>+</sup>), and DCs (CD11c<sup>+</sup>) out of total splenic immune (CD45<sup>+</sup>) cells. N = 4-5.

**D, E)** scRNA-seq analysis of islet immune cells. Violin plots showing *Il1b* (E) and *Igf1* (D) expression in the different cell clusters.

**F)** Bar diagram (mean  $\pm$  SD) showing the results of qPCR analysis of the *Il1b* transcript in total islet immune cells (CD45<sup>+</sup>; the average was set to '1') and of the CD11c<sup>+</sup> macrophages and DCs from non-transgenic adult mice. N = 4-5. \*\*\*p < 0.005 (Student's t test). Each dot represents a single sample.

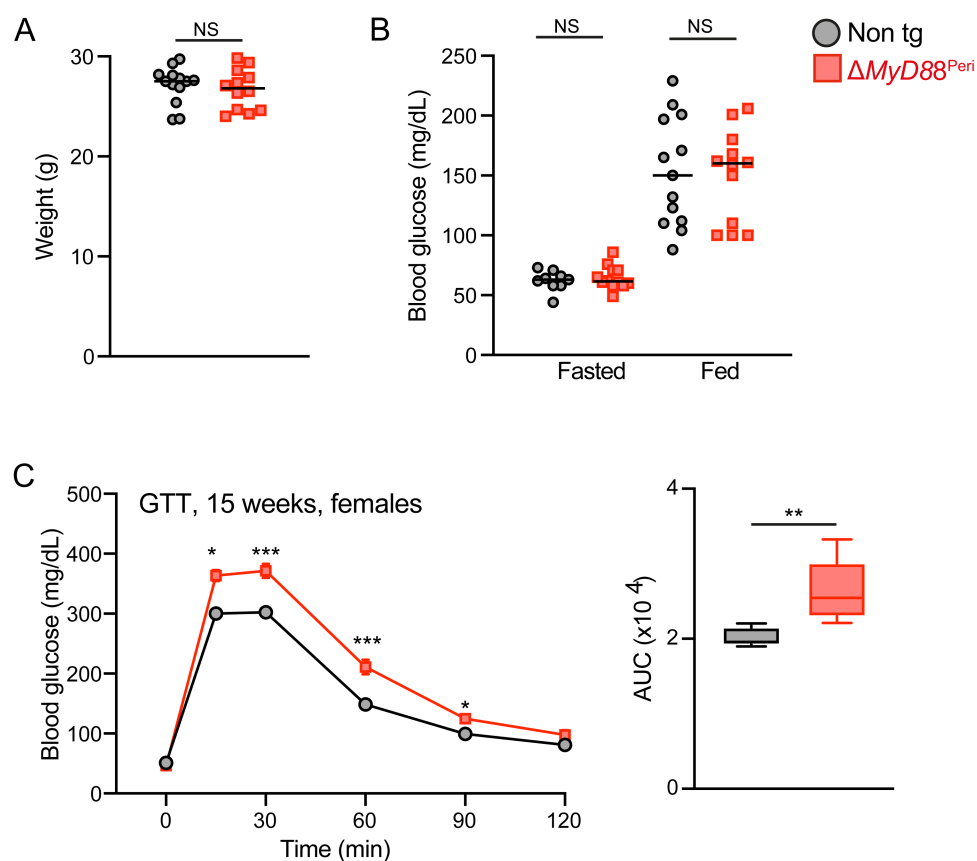

### Supplemental Figure 3: Pericytic MyD88-deficient female mice are glucose intolerant

15-week-old  $\Delta MyD88^{Peri}$  (red) and non-transgenic littermates (Cre-negative; “non tg”; gray) mice were analyzed.

**A)** Mean/dot plot shows the body weight of male mice. NS, not significant (Student's t test).

**B)** Mean/dot plot shows the blood glucose levels of male mice after an overnight fast or upon ad-lib feeding. NS, not significant (Student's t test).

**C)** Intraperitoneal glucose tolerance test (IPGTT) analysis of female mice. Shown are mean ( $\pm$  SEM) blood glucose levels (left) and area under the curve (AUC, right). N = 6-11. \* $p < 0.05$ , \*\* $p < 0.01$ , \*\*\* $p < 0.005$ , as compared with non-transgenic mice (Student's t-test).

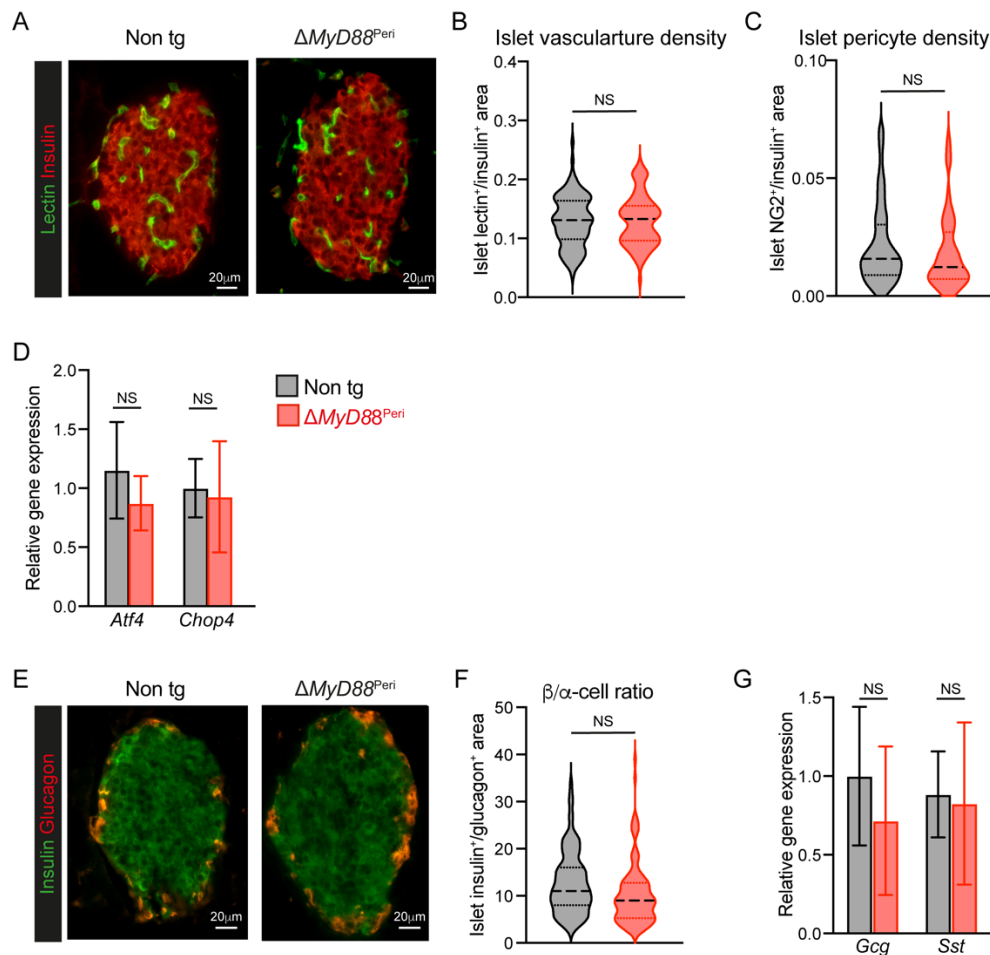

### Supplemental Figure 4: Myd88-deficiency does not affect islet morphology and vasculature density

**A, B**) Analysis of the distribution of functional vasculature.  $\Delta MyD88^{Peri}$  and non-transgenic mice were intravenously injected with tomato lectin (red) to label functional vessels. Pancreata were harvested from treated mice, and tissue sections were stained for insulin (blue bar). Images show the functional vasculature of representative islets (A), and violin diagrams show quantification of intra-islet vascular density (B). For each islet, the portion of the lectin<sup>+</sup> area out of the insulin<sup>+</sup> area was calculated.  $n > 100$ . NS, not significant (Student's t test).

**C**) Analysis of pericytes intra-islet density. Pancreatic tissues were stained for NG2 to label pericytes and insulin to label  $\beta$ -cells. The violin diagram shows a morphometric quantification of intra-islet pericyte density when the portion of NG2<sup>+</sup> area out of insulin<sup>+</sup> area was calculated per each islet.  $n > 70$ . NS, not significant (Student's t test).

**D, G**) Bar diagrams (mean  $\pm$  SD) show  $\beta$ -cell gene expression analyzed by qPCR. Average levels in control islets were set to '1'.  $N = 5-8$ . NS, not significant (Student's t test).

**E, F**) Pancreatic tissues of non-transgenic (non-tg; left) and  $\Delta MyD88^{Peri}$  (right) adult mice were immunostained for insulin (green) to label  $\beta$ -cells and glucagon (red) to label  $\alpha$ -cells. Images (E) show representative islets, and violin diagrams (F) show the ratio between  $\alpha$  - and  $\beta$ -cells in each islet.  $n > 130$ . NS, not significant (Student's t test).

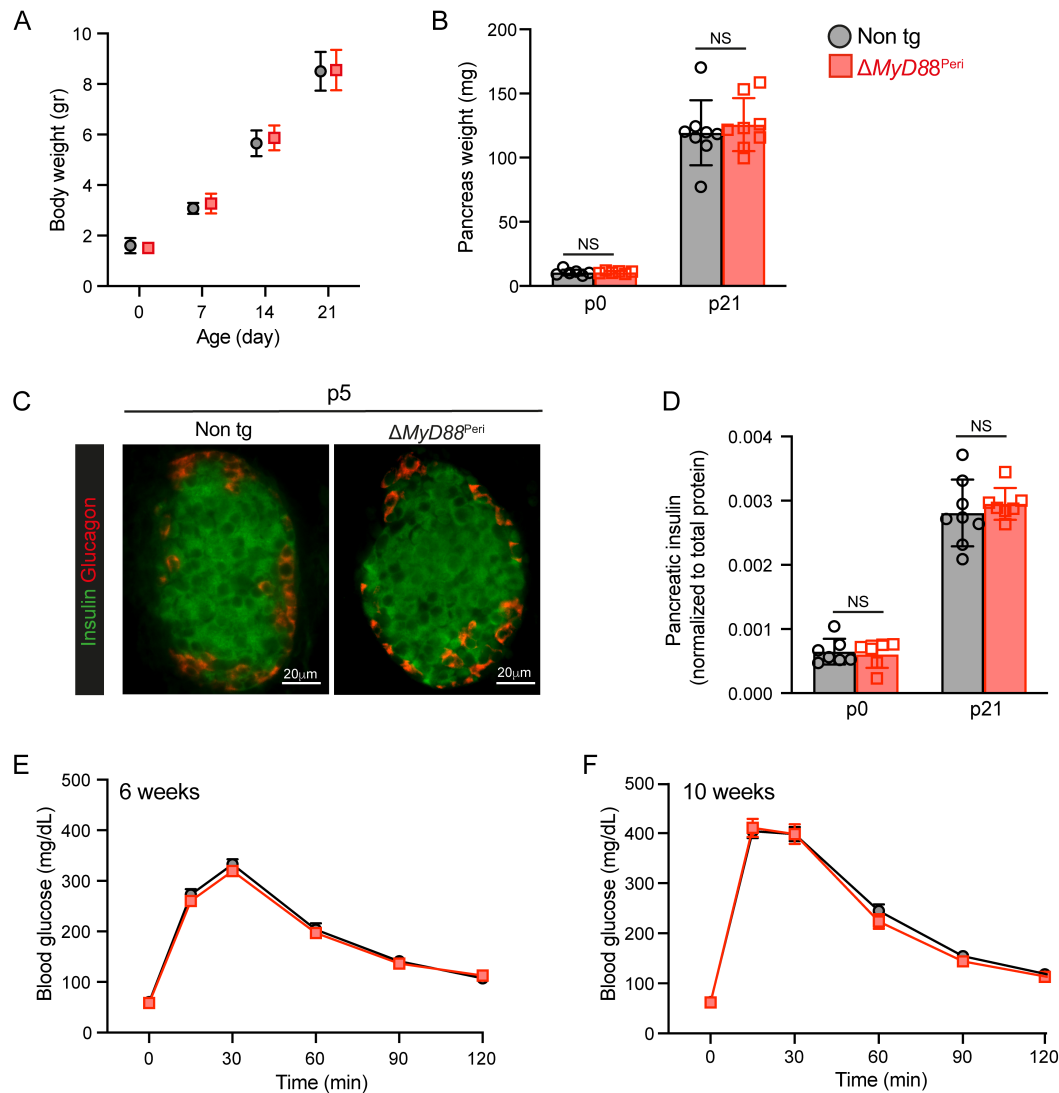

**Supplemental Figure 5: Neonatal insulin production and pre-adult glucose tolerance are maintained in  $\Delta MyD88^{Peri}$  mice**

$\Delta MyD88^{Peri}$  (red) and non-transgenic littermates (Cre-negative; "non tg"; gray) mice were analyzed.

**A)** Pups were weighed at the indicated ages. Shown are mean ( $\pm$  SEM) body weight. N=6-8.

**B)** Bar diagrams (mean  $\pm$ SD) show pancreatic weight at postnatal days (p) 0 and 21 pups. N=6-8. Each dot represents a single mouse. NS, not significant (Student's t test).

**C)** Pancreatic tissues of non-transgenic (non-tg; left) and  $\Delta MyD88^{Peri}$  (right) mice at p5 were immunostained for insulin (green) and glucagon (red). Representative islets are shown.

**D)** Bar diagram (mean  $\pm$ SD) shows pancreatic insulin content at p0 and p21, normalized to protein content. N = 6-8. Each dot represents a single mouse. NS, not significant (Student's t test).

**E, F)** IPGTT analysis of six (E; N=5) and 10 (F; N=16) weeks-old male mice. Shown are mean ( $\pm$  SEM) blood glucose levels.

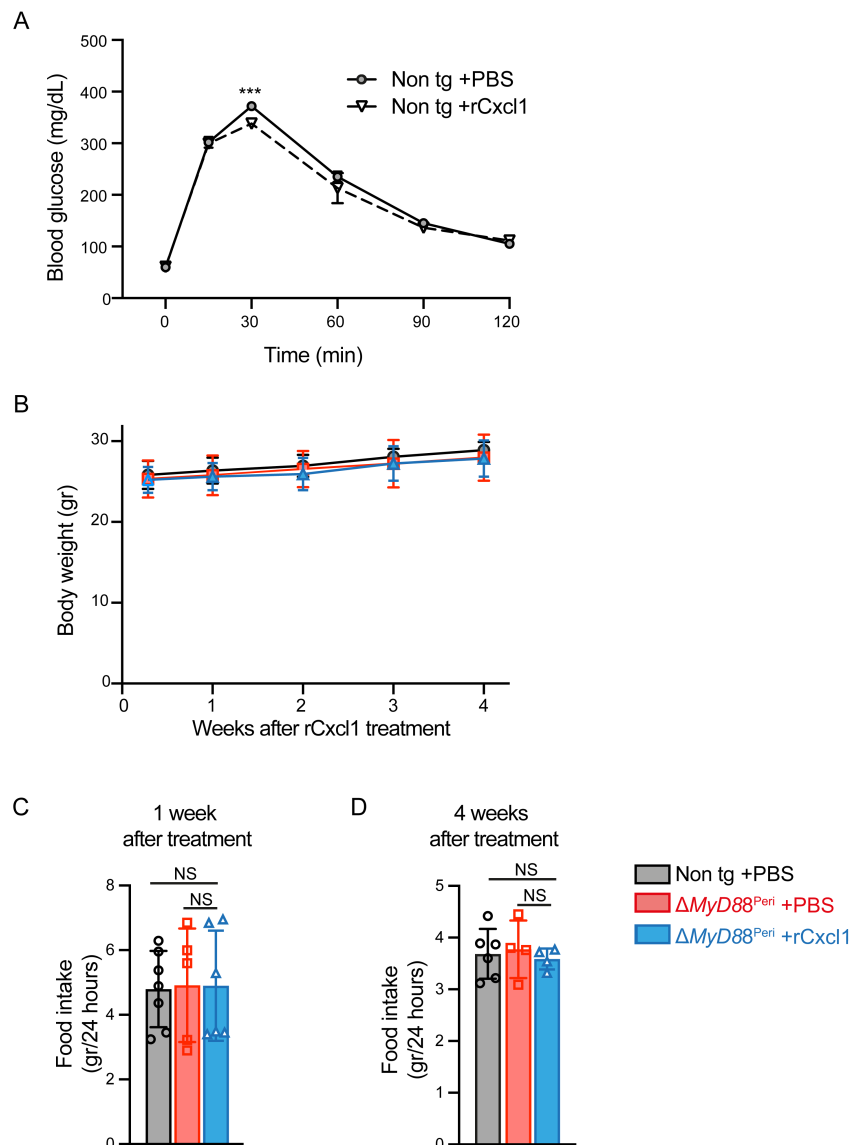

### Supplemental Figure 6: Treatment with recombinant Cxcl1 does not affect weight gain and food intake

**A)** IPGTT of non-transgenic mice treated with recombinant mouse Cxcl1 (rCxcl1; dashed line) or PBS (solid line) a week before analysis. Shown are mean ( $\pm$  SEM) blood glucose levels.  $N = 4-8$ . \*\*\* $p < 0.005$  (Student's  $t$  test).

**B)**  $\Delta MyD88^{Peri}$  male mice were treated with rCxcl1 (blue) at 14 weeks. Shown are weekly measurements of body weight (mean  $\pm$  SD) following treatment compared to age- and sex-matched untreated non-transgenic (gray) and  $\Delta MyD88^{Peri}$  (red) control mice.  $N=4-8$ .

**C, D)** 14-week-old  $\Delta MyD88^{Peri}$  male mice were treated with rCxcl1 (blue) or PBS (red), and non-transgenic (gray) male mice were treated with PBS. Shown is the weight (mean  $\pm$  SD) of food consumed over a 24-hour period by a single mouse, one (C) and four (D) weeks after rCxcl1 treatment.  $N=4-7$ . Each dot represents a single mouse. NS, not significant (ANOVA with Tukey's post-hoc).

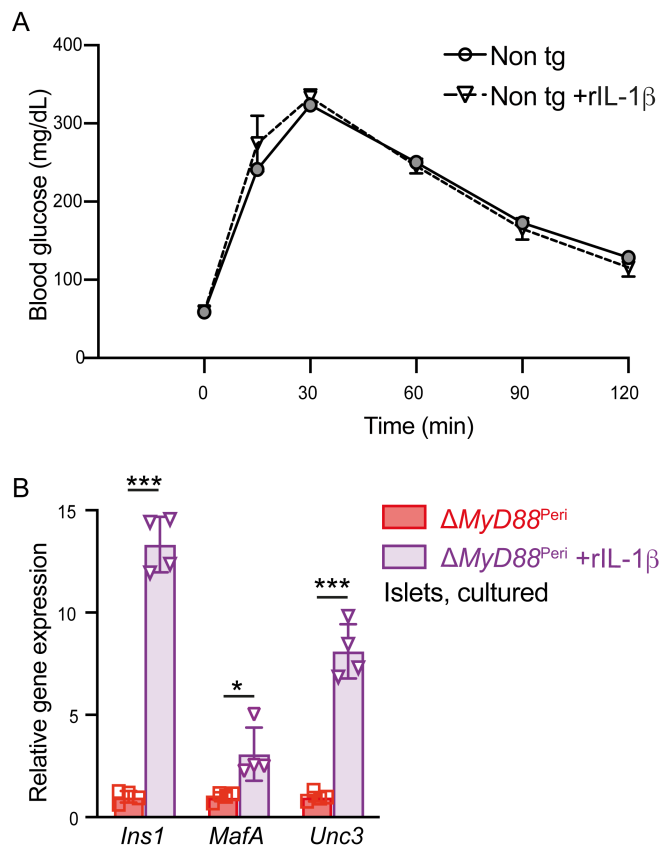

**Supplemental Figure 7: Recombinant IL-1β promotes β-cell gene expression in  $\Delta MyD88^{Peri}$  islets *in vitro***

**A)** IPGTT of non-transgenic 15-week-old mice treated with recombinant mouse IL-1β (dashed line) or PBS (solid line) a day before analysis. Shown are mean ( $\pm$  SEM) blood glucose levels. N = 4-5.

**B)** qPCR analysis of islets isolated from untreated  $\Delta MyD88^{Peri}$  mice cultured for 24 hours in a medium either containing IL-1β (purple) or not (red). N= 4. \*p < 0.05, \*\*\*p < 0.005; (Student's t test) compared to untreated mice. Each dot represents a single sample.



**Supplemental Table 3. List of primary antibodies**

| <b>Antigen</b>   | <b>Antibody</b>                                                   | <b>Source</b>            | <b>Identifier</b>               | <b>Application</b>         |
|------------------|-------------------------------------------------------------------|--------------------------|---------------------------------|----------------------------|
| CD11b            | Rat anti-CD11b, APC-conjugated (clone M1/70)                      | BioLegend                | Cat# 101211, RRID:AB_312794     | Flow cytometry             |
| CD11c            | Armenian Hamster anti-CD11c, APC-conjugated (clone N418)          | Thermo Fisher Scientific | Cat# 17-0114-81, RRID:AB_469345 | Flow cytometry             |
|                  | Armenian Hamster anti-CD11c, PE-conjugated (clone N418)           | BioLegend                | Cat# 117307, RRID:AB_313776     | Flow cytometry             |
| CD115            | Rat anti-CD115 (CSF-1R), Alexa Fluor 488-conjugated (clone AFS98) | BioLegend                | Cat# 135512, RRID:AB_11218983   | Flow cytometry             |
| CD16 /CD32 (FcR) | Rat anti-CD16/CD32 (clone 93)                                     | Thermo Fisher Scientific | Cat# 14-0161-85, RRID:AB_467134 | Flow cytometry             |
| CD19             | Rat anti-CD19, PE-conjugated (clone 1D3/CD19)                     | BioLegend                | Cat# 152407, RRID:AB_2629816    | Flow cytometry             |
| CD3              | Rat anti-CD3, APC-conjugated (clone 17A2)                         | BioLegend                | Cat# 100235, RRID:AB_2561455    | Flow cytometry             |
| CD31             | Rat anti-CD31 (PECAM1), PE-conjugated (clone 390)                 | BioLegend                | Cat# 102407, RRID:AB_312902     | Flow cytometry             |
|                  | Rat anti-CD31(PECAM1) (clone MEC13.3)                             | BD Bioscience            | Cat# 553370, RRID:AB_394816     | Immunofluorescence Primary |
| CD45             | Rat anti-CD45, APC-conjugated (clone 30-F11)                      | Thermo Fisher Scientific | Cat# 17-0451-82, RRID:AB_469392 | Flow cytometry             |
|                  | Rat anti-CD45, FITC-conjugated (clone S18009F)                    | BioLegend                | Cat# 157213, RRID:AB_2894427    | Flow cytometry             |
|                  | Rat anti-CD45, PE-conjugated (clone 30-F11)                       | BioLegend                | Cat# 103106, RRID:AB_312971     | Flow cytometry             |
|                  | Rat anti-CD45, PerCP-conjugated (clone 30-F11)                    | BD Biosciences           | Cat# 557235, RRID:AB_396609     | Flow cytometry             |
| CD64             | Mouse anti-CD64 (FcγRI), FITC-conjugated (clone X54-5/7.1)        | BioLegend                | Cat# 139316, RRID:AB_2566556    | Flow cytometry             |
|                  | Mouse anti-CD64 (FcγRI), PE-conjugated (clone X54-5/7.1)          | BioLegend                | Cat# 139304, RRID:AB_10612740   | Flow cytometry             |
| Glucagon         | Rabbit anti-glucagon (clone 13D11.33)                             | Millipore                | Cat# AB932, RRID:AB_2107329     | Immunofluorescence         |
| Iba1             | Rabbit anti-Iba1 (polyclonal)                                     | FUJIFILM Wako Chemicals  | Cat# 01919741, RRID: AB_839504  | Immunofluorescence         |
| Insulin          | Guinea pig anti-insulin (polyclonal)                              | Agilent                  | Cat# IR002, RRID:AB_2800361     | Immunofluorescence         |
| NG2              | Rabbit anti-NG2 (clone 132.38)                                    | Millipore                | Cat# AB5320, RRID:AB_91789      | Immunofluorescence         |
| TLR4             | Mouse anti-TLR4 (clone1203B)                                      | R&D systems              | Cat# MAB27591, RRID: AB_2271967 | Immunofluorescence         |

**Supplemental Table 4. List of primers and probes for qPCR**

| <b>Primers</b>         | <b>Method</b> | <b>Sequence</b>                                                               |
|------------------------|---------------|-------------------------------------------------------------------------------|
| <i>Abcc8 (Sur1)</i>    | Taqman        | Mm00803450 m1                                                                 |
| <i>Atf4</i>            | Taqman        | Mm00515324 m1                                                                 |
| <i>Cyclophilin</i>     | SYBR green    | TGCCGCCAGTGCCATT<br>TCACAGAATTATTCCAGGATTC                                    |
| <i>Cxcl1</i>           | Taqman        | Mm04207460 m1                                                                 |
| <i>Ddit3 (Chop)</i>    | Taqman        | Mm00492097 m1                                                                 |
| <i>GAPDH</i>           | Taqman        | TGCACCACCAACTGCTTAG<br>GGATGCAGGGATGATGTTC<br>Probe: CAGAAGACTGTGGATGGCCCCCTC |
| <i>Gcg</i>             | Taqman        | Mm01269055 m1                                                                 |
| <i>Igf1</i>            | Taqman        | Mm00439560 m1                                                                 |
| <i>Il1b</i>            | Taqman        | Mm00434228 m1                                                                 |
| <i>Il1rl1</i>          | Taqman        | Mm00516117 m1                                                                 |
| <i>Ins1</i>            | SYBR green    | GGGTCGAGGTGGGCC<br>CTGCTGGCCTCGCTTGC                                          |
| <i>Ins2</i>            | SYBR green    | GGCTGCGTAGTGGTGGGTCTA<br>CCTGCTCGCCCTGCTCTT                                   |
| <i>Kcnj11 (Kir6.2)</i> | SYBR green    | GGACCTCCGAAAGAGCATGA<br>GCGCACCACCTGCATGT                                     |
| <i>MafA</i>            | SYBR green    | GCTGGTATCCATGTCCGTGC<br>TGTTTCAGTCGGATGACCTCC                                 |
| <i>MyD88</i>           | Taqman        | Mm00440338 m1                                                                 |
| <i>NeuroD1</i>         | SYBR green    | ATGACCAAATCATACAGCGAGAG<br>TCTGCCTCGTGTTCTCTCGT                               |
| <i>Nkx6-1</i>          | SYBR green    | TCAGGTCAAGGTCTGGTTCCA<br>CGGTCTCCGAGTCCTGCTT                                  |
| <i>Pdx1</i>            | SYBR green    | CCCCAGTTTACAAGCTCGCT<br>CTCGGTTCCATTCGGGAAAGG                                 |
| <i>Slc2a2 (Glut2)</i>  | SYBR green    | TCAGAAGACAAGATCACCGGA<br>GCTGGTGTGACTGTAAGTGGG                                |
| <i>Sst</i>             | Taqman        | Mm00436671 m1                                                                 |
| <i>Tlr4</i>            | Taqman        | Mm00445273 m1                                                                 |
| <i>Unc3</i>            | Taqman        | Mm00453206 s1                                                                 |

**Supplemental Table 5. List of secondary antibodies**

| <b>Antibody</b>                                               | <b>Source</b>            | <b>Identifier</b>                 |
|---------------------------------------------------------------|--------------------------|-----------------------------------|
| Donkey Alexa Fluor 488-labeled anti-goat IgG (polyclonal)     | Thermo Fisher Scientific | Cat# A-11055,<br>RRID:AB_2534102  |
| Donkey Alexa Fluor 555-labeled anti-rabbit IgG (polyclonal)   | Thermo Fisher Scientific | Cat# A-31572,<br>RRID:AB_162543   |
| Donkey Alexa Fluor 555-labeled anti-rat IgG (polyclonal)      | Abcam                    | Cat# ab150154,<br>RRID:AB_2813834 |
| Goat Alexa Fluor 488-labeled anti-guinea pig IgG (polyclonal) | Thermo Fisher Scientific | Cat# A-11073,<br>RRID:AB_2534117  |
| Goat Alexa Fluor 488-labeled anti-rabbit IgG (polyclonal)     | Thermo Fisher Scientific | Cat# A-11034,<br>RRID:AB_2576217  |
| Goat Alexa Fluor 555-labeled anti-guinea pig IgG (polyclonal) | Thermo Fisher Scientific | Cat# A-21435,<br>RRID:AB_2535856  |

## References

1. Elgamal RM, et al. An Integrated Map of Cell Type–Specific Gene Expression in Pancreatic Islets. *Diabetes*. 2023;72(11):1719–1728.
2. Sakhneny L, et al. Pancreatic Pericytes Support  $\beta$ -Cell Function in a Tcf7l2-Dependent Manner. *Diabetes*. 2018;67(3):437–447.
